# Supplementary material for: One (Financial Well-Being) Model Fits All? Testing the Multidimensional Subjective Financial Well-Being Scale Across Nine Countries
Source: Springer Nature journal article supplement (doi:10.1007/s10902-024-00708-z), 2024-02-01
Supplement: MOESM1 [file 26691388]

**Supplementary Materials (SM) for:**

**One (financial well-being) model fits all? Testing the Multidimensional Subjective Financial Well-being Scale across nine countries**

| **Table S1**  *Socio-demographic Characteristics of the Total Sample and Country-specific Samples* | | | | | | | | | | | | | | | | | | | | | |
| --- | --- | --- | --- | --- | --- | --- | --- | --- | --- | --- | --- | --- | --- | --- | --- | --- | --- | --- | --- | --- | --- |
|  | | AU | | CA | | FI | | IN | | IT | | PT | | RO | | SI | TR | | Total | |
| *N* | | 568 | | 279 | | 1,000 | | 392 | | 666 | | 335 | | 317 | | 379 | 539 | | 4475 | |
| Gender (%) | |  | |  | |  | |  | |  | |  | |  | |  |  | |  | |
| *Male* | | 25.2 | | 35.5 | | 51.5 | | 55.4 | | 25.4 | | 31.6 | | 23.2 | | 38.3 | 34.7 | | 37.0 | |
| *Female* | | 74.8 | | 64.5 | | 48.5 | | 44.6 | | 74.6 | | 68.4 | | 76.8 | | 61.7 | 65.3 | | 63.0 | |
| Age (in years) | |  | |  | |  | |  | |  | |  | |  | |  |  | |  | |
| *Range* | 18-29 | | 18-29 | | 18-29 | | 18-29 | | 18-29 | | 18-29 | | 18-29 | | 18-27 | | | 18-29 | | 18-29 | |
| *Mean* | | 23.26 | | 23.76 | | 23.53 | | 23.55 | | 23.58 | | 21.61 | | 20.01 | | 20.84 | 23.15 | | 22.84 | |
| *Standard deviation* | | 2.76 | | 2.83 | | 3.44 | | 2.71 | | 2.53 | | 3.08 | | 1.75 | | 1.88 | 2.67 | | 3.02 | |
| Living arrangement (%) | |  | |  | |  | |  | |  | |  | |  | |  |  | |  | |
| *Living with parents* | | 24.8 | | / | | 20.5 | | 46.9 | | 54.2 | | 74.0 | | 34.3 | | 41.7 | 61.6 | | / | |
| *Left the parental house* | | 75.2 | | / | | 79.5 | | 53.1 | | 45.8 | | 26.0 | | 65.7 | | 58.3 | 38.4 | | / | |
| Educational status (%) | |  | |  | |  | |  | |  | |  | |  | |  |  | |  | |
| *Enrolled in education* | | 91.5 | | 71.0 | | / | | 62.5 | | 83.4 | | 85.0 | | 96.2 | | 92.9 | 60.3 | | / | |
| *Completed education* | | 8.5 | | 29.0 | | / | | 37.5 | | 16.6 | | 15.0 | | 3.8 | | 7.1 | 39.7 | | / | |
| Occupational status (%) | |  | |  | |  | |  | |  | |  | |  | |  |  | |  | |
| *Not in employment* | | 52.6 | | 28.7 | | 58.9 | | 56.9 | | 79.1 | | 75.5 | | 84.7 | | 91.0 | 60.5 | | 63.5 | |
| *Employed* | | 47.4 | | 71.3 | | 41.1 | | 43.1 | | 20.9 | | 24.5 | | 15.3 | | 9.0 | 39.5 | | 36.5 | |
| Relationship status (%) | |  | |  | |  | |  | |  | |  | |  | |  |  | |  | |
| *Single or not cohabiting* | | 71.5 | | 34.6 | | 39.0 | | 91.6 | | 95.3 | | 89.2 | | 89.7 | | 91.6 | 92.0 | | 75.3 | |
| *Cohabiting or married* | | 28.5 | | 65.4 | | 61.0 | | 8.4 | | 4.7 | | 10.8 | | 10.3 | | 8.4 | 8.0 | | 24.7 | |
| Parental status (%) | |  | |  | |  | |  | |  | |  | |  | |  |  | |  | |
| *No child* | | 98.8 | | 94.6 | | 85.5 | | 98.0 | | 99.4 | | 96.7 | | 96.4 | | 96.3 | 98.5 | | 88.6 | |
| *At least one child* | | 1.2 | | 5.4 | | 14.5 | | 2.0 | | 0.6 | | 3.3 | | 3.6 | | 3.7 | 1.5 | | 11.4 | |
| *Note*. AU = Austria; CA = Canada; FI = Finland; IN = India; IT = Italy; PT = Portugal; RO = Romania; SI = Slovenia; TR = Turkey.  The living arrangement variable was not collected in Canada. The educational status variable was not collected in Finland. Consequently, these two variables are not adopted to describe the total sample. | | | | | | | | | | | | | | | | | | | | | |

| **Table S2**  *Details about Data Collection Separately for Each Country* | | | |
| --- | --- | --- | --- |
| Country | Data collected on | Sampling strategy | Procedure |
| Austria | April – July 2019 | Convenient and snowball sampling | Information about the online-survey was given to students in University courses (using e-learning platforms of members of the research team and colleagues respectively); email invitations were sent to friends, acquaintances and peers by student members of the research team; information was also posted in groups on Facebook and on several platforms supporting research (e.g. SurveyCircle, Pollpool, SurveySwap and Thesius). In addition, Flyers were used to search for possible participants at different university campuses in Vienna. Student emerging adults were asked to share information about the study with non-student peers. Subjects provided informed consent online before participating. Taking part in the study was totally voluntary, subjects could also withdraw from the study at any time and they did not receive any credits or compensation. |
| Canada | October-November 2019 | Convenient and snowball sampling | After receiving approval from the ethical commission of the Université du Québec à Trois-Rivières, the following recruiting procedures were used: email invitiation to members of an association composed of researchers (students and non-students) in psychology, facebook post on researcher’s page, facebook post in a group composed of people interested in financial matters, facebook advertisement, invitation on the researcher’s university’s student and employee portal. All emerging adults that received the invitation were asked to share the invitation. Participants had to fill an online survey. A draw was weld among the participants, and one participant out of 100 received a compensation of 50$. |
| Finland | December 2020 | Online web panel | The web panel sample was gathered to represent Finland as a whole according to age groups of 18-22, 23-25 and 26-29 years, gender and area (greater areas, NUTS2). In these fields, the data matches the general population well. Persons in the panel were contacted in random order between 2th to 11th December 2020. In total, 1,000 answers were gathered. The whole CINT panel consists of approximately 350,000 panelists in Finland. The web panelists are volunteers, who choose to respond to surveys according to their likes and interests. The panelists are also awarded prizes and compensation for their time and effort. The data belongs to the DigiConsumers research project funded by the Strategic Research Council (SRC) established within the Academy of Finland and the data will be used in other project publications. |
| India | July – September 2020 | Convenient and snowball sampling | Email invitations were sent to the students and alumunus of the institutes and non students emerging adults known to the research team. Emerging adults were asked to confirm their agreement for filling the survey and on receipt of an affirmative response, they were sent a separate email with a link to fill the survey. All emerging adults were asked to share the invitation with their peers. Participants did not receive any compensation. |
| Italy | March – April 2019 | Convenient and snowball sampling | After receiving approval from the ethical commission of the Università Cattolica del Sacro Cuore, email invitations were sent to university students as well as non-student emerging adult friends of members of the research team. All emerging adults who received the email invitation were asked to share the invitation with their  non-student peers. Emerging adults interested in participating, received another email with the link to fill an online survey and to sign an online consent. Participants did not receive any compensation. |
| Portugal | May 2019 – February 2020 | Convenient and snowball sampling | Data were collected using both in-person (52.0%) and  online (48.0%) survey administration strategies. Regarding the in-person data collection, students from three Portuguese universities were asked to partecipate in this study, by completing a papel-and-pencil questionnaire and/or by inviting people from their network of friends and acquaintances to do the same. They were given hard copies of the survey to return to the research team when duly completed. In addition, a web link for the online survey version was created and shared on the Portuguese research team’s Facebook page. Informed consent was obtained from all participants, who did not receive any compensation for their collaboration. |
| Romania | March-August 2019 | Convenient  Sampling | After receiving the approval from the ethical committee of the Babes-Bolyai University, emerging adults were invited to participate in the study through presentations at their universities and at youth-focused events. Participants gave their active consent for participating in the study and then filled in the pen-and-paper questionnaire. Participants did not receive any compensation. |
| Slovenia | March – June 2019 | Convenient and snowball sampling | Data were collected online. University students (in courses thaught by the research team members and their emerging adult acquaintances) were invited to participate and asked to share the invitation with their friends who were of different gender and preferably not students. Participants provided informed consent online before participating. They did not receive any compensation. |
| Turkey | October – November 2020 | Convenient and snowball sampling | Snowball sampling was utilized in the study. Following the Middle East Technical University Human Subjects Ethics Committee's approval, firstly, a group of emerging adults (both undergraduate and graduate students; employed and unemployed) was contacted by researchers via email, and an invitation to participate in the survey was sent. Secondly, researchers requested the first group of survey participants to invite their emerging adult friends to participate in the study. Thirdly, when they received their friends’ approval, they either sent a survey link to their emerging adult friends via email or did send their friends' email addresses to researchers to be contacted by them. This procedure was repeated with the second and third groups of participants. Emerging adults who wanted to participate in the study received an email explaining the aim and the procedure of the study, the survey link, and the informed consent. Participants gave their consent by clicking the “Yes” button. Participants did not receive any compensation. The data here used were also adopted in the validation study of the Turkish version of MSFWBS. |

| **Table S3**  *Standardized Factor Loadings for the 25 items of the Multidimensional Subjective Financial Well-being Scale (MSFWBS) by Country* | | | | | | | | | |
| --- | --- | --- | --- | --- | --- | --- | --- | --- | --- |
|  | AU | CA | FI | IT | PT | RO | SI | TR | Total sample without India (N = 4083) |
| Item 1 | .76 | .89 | .73 | .74 | .77 | .87 | .80 | .80 | .78 |
| Item 2 | .74 | .88 | .65 | .76 | .58 | .54 | .77 | .80 | .74 |
| Item 3 | .77 | .73 | .74 | .77 | .61 | .74 | .62 | .73 | .76 |
| Item 4 | .75 | .82 | .70 | .68 | .79 | .78 | .71 | .79 | .75 |
| Item 5 (r) | .73 | .67 | .43 | .72 | .60 | .60 | .68 | .72 | .69 |
| Item 6 | .78 | .78 | .60 | .82 | .64 | .62 | .69 | .80 | .74 |
| Item 7 (r) | .82 | .83 | .72 | .78 | .73 | .64 | .82 | .79 | .77 |
| Item 8 | .76 | .85 | .76 | .77 | .82 | .79 | .79 | .83 | .80 |
| Item 9 (r) | .83 | .83 | .62 | .83 | .81 | .81 | .85 | .75 | .81 |
| Item 10 (r) | .64 | .71 | .43 | .74 | .68 | .60 | .58 | .73 | .66 |
| Item 11 | .63 | .75 | .52 | .48 | .45 | .55 | .57 | .66 | .59 |
| Item 12 | .63 | .84 | .60 | .82 | .82 | .78 | .50 | .85 | .70 |
| Item 13 | .79 | .80 | .64 | .64 | .63 | .44 | .81 | .60 | .65 |
| Item 14 (r) | .69 | .70 | .73 | .75 | .76 | .66 | .65 | .77 | .73 |
| Item 15 | .79 | .62 | .67 | .77 | .73 | .78 | .72 | .74 | .76 |
| Item 16 | .83 | .87 | .82 | .87 | .90 | .86 | .84 | .88 | .86 |
| Item 17 | .67 | .61 | .62 | .65 | .37 | .76 | .56 | .63 | .65 |
| Item 18 (r) | .82 | .70 | .72 | .80 | .74 | .76 | .71 | .68 | .74 |
| Item 19 | .76 | .86 | .80 | .87 | .89 | .87 | .74 | .85 | .82 |
| Item 20 | .61 | .47 | .50 | .59 | .55 | .75 | .45 | .70 | .60 |
| Item 21 | .76 | .78 | .73 | .70 | .76 | .74 | .65 | .82 | .77 |
| Item 22 | .71 | .86 | .73 | .72 | .79 | .66 | .69 | .69 | .72 |
| Item 23 (r) | .86 | .87 | .75 | .89 | .85 | .86 | .85 | .72 | .85 |
| Item 24 | .80 | .89 | .74 | .79 | .84 | .82 | .80 | .77 | .80 |
| Item 25 | .80 | .92 | .81 | .82 | .83 | .89 | .88 | .87 | .87 |
| *Note.* AU=Austria; CA = Canada; FI = Finland; IT = Italy; PT = Portugal; RO = Romania; SI = Slovenia; TR = Turkey. (r) = the score of the item has been reversed before being included in the model.  All factor loadings were significant at *p* < .001. | | | | | | | | | |

| **Table S4**  *Correlations among the Five Factors of the Multidimensional Subjective Financial Well-being Scale Model by Country* | | | | | | | | | |
| --- | --- | --- | --- | --- | --- | --- | --- | --- | --- |
|  | AU | CA | FI | IT | PT | RO | SI | TR | Total sample without India (N = 4083) |
| GFWB with FF | .56 | .82 | .84 | .47 | .65 | .44 | .64 | .62 | .67 |
| GFWB with MM | .65 | .87 | .85 | .40 | .69 | .48 | .63 | .43 | .61 |
| GFWB with HM | .84 | .74 | .58 | .81 | .76 | .72 | .78 | .85 | .79 |
| GFWB with PC | .75 | .81 | .64 | .81 | .69 | .73 | .75 | .82 | .76 |
| FF with MM | .67 | .91 | .87 | .62 | .75 | .44 | .75 | .54 | .70 |
| FF with HM | .36 | .53 | .40 | .29 | .45 | .23 | .38 | .42 | .43 |
| FF with PC | .40 | .71 | .52 | .29 | .31 | .25 | .44 | .35 | .47 |
| MM with HM | .49 | .59 | .44 | .23 | .47 | .23 | .40 | .27 | .40 |
| MM with PC | .37 | .70 | .52 | .22 | .41 | .19 | .44 | .28 | .41 |
| HM with PC | .75 | .74 | .84 | .79 | .68 | .70 | .67 | .80 | .74 |
| *Note*. AU = Austria; CA = Canada; FI = Finland; IT = Italy; PT = Portugal; RO = Romania; SI = Slovenia; TR = Turkey. All correlations were significant at *p* < .001.  General Financial Well-being (GFWB), Financial Future (FF), Money Management (MM), Having Money (HM), and Peer Comparison (PC) are the five factors of the Multidimensional Subjective Financial Well-being Scale. | | | | | | | | | |

| **Table S5**  *Mean Comparison across Countries of the Five Factors of the Multidimensional Subjective Financial Well-being Scale* | | | | | |
| --- | --- | --- | --- | --- | --- |
|  | General Financial  Well-being | Financial  Future | Money  Management | Having  Money | Peer  Comparison |
| Austria | .57a | .24a | .33a | .61b | .57bc |
| Canada | .38a | .44a | .15ab | .80a | 1.25a |
| Finland | -.34c | -.58c | -.55e | -.49d | -.07d |
| Italy | -.22c | -.33c | -.22d | -.01c | -.01d |
| Portugal | 0b | 0b | 0bc | 0c | 0d |
| Romania | .35a | .24a | -.49e | -.19c | .81b |
| Slovenia | .42a | .25b | -.08cd | .55b | .59bc |
| Turkey | -.49d | -.26c | -.04bc | -.61d | .44c |
| Cohen’s *f* | .35 | .49 | .35 | .40 | .53 |
| *Note.* General Financial Well-being, Financial Future, Money Management, Having Money, and Peer Comparison are the five factors of the Multidimensional Subjective Financial Well-being Scale.  A factor mean is significantly different from another mean if they have different superscripts. For example, for the “General Financial Well-being” factor, emerging adults from Austria reported mean levels of general financial well-being that were not significantly different from those reported by Romanian and Slovenian emerging adults’ mean levels (as all of these means had the same superscript, a). Instead, emerging adults from Austria reported mean levels of general financial well-being that were significantly different from Portuguese emerging adults’ mean levels (as the Portugal mean had a different superscript, b). | | | | | |

Table S5 reports the aligned factor means for each country, i.e., the latent mean that each of the five factors of the MSFWBS has in the output of the approximate measurement invariance. In this analysis, the factors mean comparison is automatically performed and reported by Mplus; in particular, the output indicates, separately for each factor, which countries have means that are significantly different at 5% level (Muthén & Asparouhov, 2018). As this test only informs whether means are or are not significantly different, but does not provide information about the size of the difference, we also calculated and reported Cohen’s f as effect size information. Cohen’s *f* values were estimated using calculators provided in psychometrica.de ([www.psychometrica.de/effect_size.html](http://www.psychometrica.de/effect_size.html)). Cohen (1988) suggested that the *f* values of .10, .25, and .40 represent small, medium, and large effect sizes, respectively. We detected significant differences across countries for each of the five dimensions of the scale. In particular, differences were medium in size (.25 < *f* < .40) for the general subjective financial well-being and the money management factors, while differences were large in size (*f* > .40) for the other three factors. Furthermore, for each factor of the scale, Canadian emerging adults reported the highest level of financial well-being, in some factors together with Austrian and Slovenian emerging adults. Conversely, Turkey and Finland were the two countries that scored the lowest on emerging adults’ financial well-being. These differences are meaningful, as Canada and Austria are among the countries with the highest per capita GDP (World Bank Group, 2021) and happiness (Helliwell et al., 2020), while Turkey and Finland were the only two countries in which data collection was conducted during the ongoing COVID-19 pandemic (see Table S2 of the SM); consequently their responses may have been affected by the pessimistic view of the current and future global and personal financial situation prevalent in many countries during the pandemic. Furthermore, Turkey also has both the lowest per capita GDP (World Bank Group, 2021) and happiness level (Helliwell et al., 2020) of the eight countries included in the comparison.

Though these differences seem to be meaningful, it is important to stress that these interpretations need to be read with caution as they are based on samples that often are not fully representative of the emerging adult population of the respective country.

| **Table S6**  *Measurement Invariance of the Satisfaction with Life Scale (SWLS) across Countries (n = 3,899)* | | | | | | | |
| --- | --- | --- | --- | --- | --- | --- | --- |
|  | *χ2* | *df* | *P* | CFI | RMSEA [90% CI] | *SRMR* | *ΔCFI* |
| Total sample | 105.393 | 5 | <.001 | .982 | .072 [.060 .084] | .021 |  |
| Configural | 143.329 | 40 | <.001 | .982 | .073 [.060 .086] | .024 |  |
| Weak | 221.880 | 68 | <.001 | .973 | .068 [.058 .078] | .042 | -.009 |
| Strong | 234.953 | 96 | <.001 | .976 | .054 [.046 .063] | .042 | +.003 |
| *Note.* CFI = Comparative Fit Index; RMSEA = Root Mean Square Error of Approximation; SRMR = Standardized Root Mean Square Residual; CI = Confidence Interval; *df* = degrees of freedom. | | | | | | | |

The reason why we tested the measurement invariance of SWLS was to verify “whether the construct has the same meaning for each group” (Dimitrov, 2010, p. 124), which we believe is a relevant issue even if we do not compare SWLS scores across those groups. Furthermore, following the open science practice, the scientific community (see for example Hussey & Hughes, 2020) has recently suggested to report as much information as possible about the measurement properties of the scales adopted in the studies (even when it is not the focus of the paper).

| **Table S7**  *Pearson Correlation Coefficients Representing Evidence of Convergent and Criterion-related Validity for the Five Factors of the Multidimensional Subjective Financial Well-being Scale Obtained Adopting a Pooled Sample (N = 2232) Composed by Balanced Samples (N = 279 from each country)* | | | |
| --- | --- | --- | --- |
|  | Personal income | Economic independence | Life satisfaction |
| General Financial Well-being | .20[.15, .26]*** | .03[-.01, .08] | .56[.52, .60]*** |
| Financial Future | .15[.09, .21]*** | .03[-.02, .08] | .54[.50, .58]*** |
| Money Management | .22[.17, .28]*** | .10[.05, .15]*** | .45[.41, .50]*** |
| Having Money | .24[.19, .29]*** | .01[-.03, .06] | .36[.31, .41]*** |
| Peer Comparison | .28 [.23 .34]*** | .08 [.02 .13]** | .42 [.37 .47]*** |
| ***p<.01, ***p<.001*  95% Confidence intervals are reported in parenthesis.  General Financial Well-being, Financial Future, Money Management, Having Money, and Peer Comparison are the five factors of the Multidimensional Subjective Financial Well-being Scale.  Countries included in the Pooled Samples are all except India: Austria, Canada, Finland, Italy, Portugal, Romania, Slovenia, Turkey. | | | |

In order to be sure that the results reported in Table 5 of the manuscript were not affected by having unbalanced samples across the different countries, we ran the same analysis using balanced samples. In particular, we used only 279 participants from each country. This size (279) was the original sample size of the Canadian sample, which was the smallest sample. Participants were selected, separately for each country, using the random procedure available in SPSS. Balanced samples of 279 emerging adults per country were then merged (*N* = 2,232) and adopted to run the model in Mplus. The model had good fit indices [χ2 (438) = 3295.752; *p* < .001; RMSEA = 0.054[0.052 - 0.056]; CFI = 0.911; SRMR = 0.049] and its correlation coefficients (see Table S7) are highly similar to the one obtained using all of the participants available (i.e., unbalanced samples across countries) and reported in Table 5 of the manuscript.

| **Table S8**  *Pearson Correlation Coefficients Representing Evidence of Convergent and Criterion-related Validity Separately for Each Country* | | | | | |
| --- | --- | --- | --- | --- | --- |
|  | General Financial Well-being | Financial  Future | Money Management | Having  Money | Peer Comparison |
| *Personal income*a |  |  |  |  |  |
| Austria | .137** | .116* | .062 | .145** | .272*** |
| Italy | .331*** | .204* | .315*** | .439*** | .610*** |
| Portugal | .124* | .156* | .137* | .167** | .106 |
| Romania | .007 | .023 | .028 | .079 | .055 |
| Slovenia | .200*** | .236*** | .216*** | .153** | .324*** |
| *Economic independence*b | | | | | |
| Austria | .008 | -.003 | .096* | .058 | .107* |
| Finland | -.016 | .002 | .091* | .083* | .043 |
| Italy | .048 | .088 | .170* | .061 | .214*** |
| Portugal | .006 | -.022 | -.098 | -.062 | .012 |
| Romania | -.050 | .075 | .146* | -.070 | -.004 |
| Slovenia | -.075 | .140* | .079 | -.135* | .006 |
| Turkey | .277*** | .058 | .116* | .172** | .264*** |
| *Life satisfaction* |  |  |  |  |  |
| Austria | .596*** | .540*** | .509*** | .392*** | .370*** |
| Canada | .629*** | .508*** | .521*** | .472*** | .449*** |
| Finland | .654*** | .647*** | .583*** | .279*** | .388*** |
| Italy | .479*** | .462*** | .364*** | .300*** | .352*** |
| Portugal | .706*** | .548*** | .465*** | .495*** | .495*** |
| Romania | .605*** | .564*** | .451*** | .342*** | .377*** |
| Slovenia | .503*** | .412*** | .320*** | .277*** | .336*** |
| Turkey | .715*** | 636*** | .465*** | .635*** | .588*** |
| **p* < .05; ***p* < .01, ******p*** < .001  General Financial Well-being, Financial Future, Money Management, Having Money, and Peer Comparison are the five factors of the Multidimensional Subjective Financial Well-being Scale.  Latent factors’ significant correlations with Personal income Economic independence are evidence of Convergent validity, while significant correlations with Life satisfaction are evidence of Criterion-related validity.  aData about Personal income were not available for samples collected in Canada, Finland, and Turkey.  bData about Economic independence were not available for Canadian emerging adults. | | | | | |

| **Table S9**  *Items of the Multidimensional Subjective Financial Well-being Scale (MSFWBS)* | | |
| --- | --- | --- |
| Item order | Factor | Item |
| 1 | MM | I am satisfied with the way I manage my money. |
| 2 | PC | My financial situation is better than my peers’ one. |
| 3 | GS | I have enough money to pursue my passions. |
| 4 | MM | I am satisfied with the way I spend my money. |
| 5 | GS | I have less money than I need. (R) |
| 6 | GS | I cannot complain about my financial situation. |
| 7 | PC | My financial condition is worse than my friends’ one. (R) |
| 8 | GS | I'm satisfied with how my life is going from a financial point of view. |
| 9 | HM | Sometimes I miss funds to buy things I need. (R) |
| 10 | GS | I am daily stressed because of my financial situation. |
| 11 | FF | In the near future, I will have enough money to carry my plans out. |
| 12 | GS | I'm calm about my financial situation. |
| 13 | MM | I feel I can handle my financial situation. |
| 14 | HM | I cannot do some things with my friends, because I do not have the money to do them. (R) |
| 15 | GS | I have enough funds for everything I need. |
| 16 | GS | I’m satisfied with my present financial situation. |
| 17 | FF | I expect to be very satisfied with the financial situation that I will achieve thanks to my persistence. |
| 18 | PC | My peers have usually more money available for free time activities than me. (R) |
| 19 | GS | My current financial situation makes me feel at ease. |
| 20 | FF | The study/work path I have undertaken will allow me to achieve a satisfying financial situation. |
| 21 | GS | I have enough funds to enjoy my life. |
| 22 | FF | I am satisfied with the way I am preparing myself to reach my long-term financial goals (for example, to buy a car). |
| 23 | HM | Sometimes I do not have the money to buy what I need. (R) |
| 24 | FF | I’m on the right track to meet my financial goals. |
| 25 | MM | I am satisfied with the way I manage my financial situation. |
| *Note.*  (R) indicates items that need to be recoded.  Factors labels are **GS** = General Subjective Financial Well-being; **FF** = Financial Future; **HM** = Having Money; **MM** =Money Management; **PC**= Peer Comparison. | | |

The MSFWBS is a 25-item scale; all items and the order in which they have to be administered are reported in Table S9. These items need to be introduced by the following instruction: “Below are some statements regarding your financial condition and the way you live it. We ask you to indicate, for each statement, how much this is true for you, choosing one of the following options: 1 = absolutely false; 2 = more false than true; 3 = neither false nor true; 4 = more true than false; 5 = absolutely true.”

Translations of these items and instruction in Finnish, French, German, Italian, Portuguese, Romanian, Slovenian, and Turkish are available here: <https://osf.io/ptbg5/?view_only=e243c3c31c4d4c218177e4b3a32dc029>.

As the current study has demonstrated that both the 1-factor model and the second-order factor model do not fit the data sufficiently well, it is not appropriate to compute a total score of the 25 items. Evidence collected so far suggests that the 25 items should only be grouped in the five factors proposed by the original model of the scale (Sorgente & Lanz, 2019): General Subjective Financial Well-being (GS); Financial Future (FF); Having Money (HM); Money Management (MM); and Peer Comparison (PC).

At the same time, as suggested by current guidelines (Hussey & Hughes, 2020; Zumbo, 2005, 2007), the validity of a scale cannot be taken for granted, even if it was already tested in a validation study. Validity is not a property of a test, as the validity of a test may change from one context to the other (Zumbo, 2007). Whereas according to the traditional view of validity, test developers are the only ones who have to evaluate if an instrument is valid or not, the current view of validity also calls for test users, who, together with test developers, have to collect different kinds of validity evidence in order to demonstrate the construct validity of the scores obtained from a test in a specific sample or context (Zumbo, 2005).

In other words, we invite scholars who are going to adopt the MSFWBS to first confirm its 5-factor structure using their own data. Confirming the 5-factor structure of the MSFWBS means to run a Confirmatory Factor Analysis model where the 25 items load on the specific factor they are expected to load on (see Table S9) and verify that this model holds, both evaluating the model fit indices (Fan & Sivo, 2007; Hu & Bentler, 1999; Marsh et al., 2004) and its factor loading estimates (i.e., significant factor loadings with a value higher than .40; Hair et al., 2010). Furthermore, scholars should verify that each subscale is sufficiently reliable by testing its internal consistency. Current guidelines (e.g., Dunn et al., 2014; Goodboy & Martin, 2020; Hayes & Coutts, 2020) suggest to estimate internal consistency by using omega (McDonald, 1970) instead of Cronbach’s alpha. Omega should be higher than .60 (Bagozzi & Yi, 1988), and preferably higher than .70 (Hair et al., 2010), to consider each subscale sufficiently reliable.

If both score structure validity (model fit, factor loadings’ significance, and size) and reliability (omega) criteria are satisfied, scholars can calculate each of the five subscale of the MSFWBS (general subjective financial well-being, financial future, having money, money management, peer comparison) by averaging the scores of items which belong to the same factor (summative index) or by adopting the latent factor score. In the former case (summative index) each subscale score can range from 1 to 5 (as items are measured on a 5-point Likert scale), where a value of 3 can be considered an average level of financial well-being. In this way, higher scores demonstrate a higher level of financial well-being, while lower scores indicate a lower level of financial well-being.

In the latter case (latent factor score), each subscale score will have a mean of zero and a standard deviation of 1. This implies that individuals with negative scores can be considered as emerging adults who have a financial well-being lower than their peers (i.e., other respondents). Individuals with positive scores can be considered as emerging adults who have a financial well-being higher than their peers. It is important to stress that in these two cases, scholars use different reference points. In the first case, the reference point (3 in a scale of 5 points) is based solely on theory, while in the second case the reference point (zero) is based on the average level reported in the specific sample the researcher is using. Scholars should select the method to calculate the total score of the subscale based in their preferred reference point.

It is also important to specify that the summative index can be used in any kind of study except for the one in which the researchers intend to compare sub-groups (e.g., different age groups, gender groups, countries). In these cases, the measurement invariance across groups should be first tested (see Dimitrov, 2010 for guidelines) and, if a sufficient level of invariance is reached, the five dimensions of the MSFWBS can be compared across groups. Specifically, if a *strict* levelof measurement invariance has been reached (i.e., factor loadings, intercepts and residuals are invariant across groups), the summative indexes (i.e., average of items belonging to the same subscale) can be used to perform comparisons across groups. If instead, only a *strong* levelof measurement invariance has been reached (i.e., only factor loadings and intercepts have been proved to be invariant across groups), the scores of the *latent* factors should be adopted to compare groups (Wu et al., 2007). In particular, generalizability evidence collected in the current study allows researchers to only compare latent factors’ scores across countries (Austria, Canada, Finland, Italy, Portugal, Romania, Slovenia, and Turkey) and not the summative scores as, using the approximate measurement invariance with alignment method, we only tested the equivalence of factor loadings and intercepts across countries.

When scholars run the Confirmatory Factor Analysis and the 5-factor model is not confirmed (e.g., poor model fit or non-significant and/or weak factor loadings) or factors are not reliable (poor internal consistency), scholars should try to identify the origin of this result (e.g., translation issues, sample comparability, differential applicability of item contents; Byrne & van de Vijver, 2017) and proceed accordingly. We suggest not to modify the scale (e.g., removing items with weak factor loadings) unless validity evidence for the new version of the scale is collected (Hussey & Hughes, 2020).

In cases in which test users cannot administer 25 items, we suggest, in agreement with Sorgente & Lanz (2019), to administer only the 10 items belonging to the General Subjective Financial Well-being (GS) factor. After confirming the mono-dimensional structure of this scale, its total score, despite not being able to summarize the richness and complexity of the subjective financial well-being construct, can offer a brief and general evaluation of the perception emerging adults have of their financial condition. This procedure has already been adopted in other publications (see for example Li et al., 2023; Lanz et al., 2020).

**References**

Bagozzi, R. P., & Yi, Y. (1988). On the evaluation of structural equation models. *Journal of the Academy of Marketing Science, 16,* 74–94. <https://doi.org/10.1177/009207038801600107>

Byrne, B. M., & van de Vijver F. J. (2017). The maximum likelihood alignment approach to testing for approximate measurement invariance: A paradigmatic cross-cultural application. *Psicothema, 29*(4), 539-551. <https://doi.org/10.7334/psicothema2017.178>

Cohen, P. A. (1988). *Statistical power analysis for the behavioural sciences*. Erlbaum

Dimitrov, D. M. (2010). Testing for factorial invariance in the context of construct validation. *Measurement and Evaluation in Counseling and Development, 43*(2), 121-149. <https://doi.org/10.1177/0748175610373459>

Dunn, T. J., Baguley, T., & Brunsden, V. (2014). From alpha to omega: A practical solution to the pervasive problem of internal consistency estimation. *British Journal of Psychology, 105*(3), 399-412. <https://doi.org/10.1111/bjop.12046>

Fan, X., & Sivo, S. A. (2007). Sensitivity of fit indices to model misspecification and model types. *Multivariate Behavioral Research, 42*(3), 509–529. <https://doi.org/10.1207/s15327752jpa4901_13>

Goodboy, A. K., & Martin, M. M. (2020). Omega over alpha for reliability estimation of unidimensional communication measures. *Annals of the International Communication Association, 44*(4), 422-439. <https://doi.org/10.1080/23808985.2020.1846135>

Hair, J. F., Black, W. C., Babin, B. J., & Anderson, R. E. (2010). *Multivariate data analysis* (7th ed.). Prentice Hall.

Hayes, A., & Coutts, J. (2020). Use Omega rather than Cronbach’s alpha for estimating reliability. But… *Communication Methods and Measures, 14*(1), 1–24. <https://doi.org/10.1080/19312458.2020.1718629>

Helliwell, J. F., Layard, R., Sachs, J., & De Neve, J. (2020). *World Happiness Report 2020*. *Sustainable Development Solutions Network*. Retrieved from <https://happiness-report.s3.amazonaws.com/2020/WHR20.pdf>

Hu, L. T., & Bentler, P. M. (1999). Cutoff criteria for fit indexes in covariance structure analysis: Conventional criteria versus new alternatives. *Structural Equation Modeling: A Multidisciplinary Journal, 6*(1), 1-55. <https://doi.org/10.1080/10705519909540118>

Hussey, I., & Hughes, S. (2020). Hidden invalidity among 15 commonly used measures in social and personality psychology. *Advances in Methods and Practices in Psychological Science, 3*(2), 166-184. <https://doi.org/10.1177/2515245919882903>

Li, L., Serido, J., Vosylis, R., Sorgente, A., Lep, Ž., Zhang, Y., ... & Lanz, M. (2023). Employment disruption and wellbeing among young adults: A cross-national study of perceived impact of the COVID-19 lockdown. *Journal of Happiness Studies,* 24(3), 991-1012. <https://doi.org/10.1007/s10902-023-00629-3>

Lanz, M., Sorgente, A., & Danes, S. M. (2020). Implicit family financial socialization and emerging adults’ financial well-being: A multi-informant approach. *Emerging Adulthood, 8*(6), 443-452. <https://doi.org/10.1177/2167696819876752>

Marsh, H. W., Hau, K. T., & Wen, Z. (2004). In search of golden rules: Comment on hypothesis-testing approaches to cutoff values for fit indexes and dangers in overgeneralizing Hu & Bentler (1999). *Structural Equation Modeling, 11*, 320–341. <https://doi.org/10.1207/s15328007sem1103_2>

McDonald, R. P. (1970). The theoretical foundations of principal factor analysis, canonical factor analysis, and alpha factor analysis. *British Journal of Mathematical and Statistical Psychology, 23*(1), 1–21. <https://doi.org/10.1111/j.2044-8317.1970.tb00432.x>

Muthén, B., & Asparouhov, T. (2018). Recent methods for the study of measurement invariance with many groups: Alignment and random effects. *Sociological Methods & Research, 47*(4), 637-664. <https://doi.org/10.1177/0049124117701488>

Sorgente, A., & Lanz, M. (2019). The multidimensional subjective financial well-being scale for emerging adults: Development and validation studies. *International Journal of Behavioral Development, 43*(5), 466-478. <https://doi.org/10.1177/0165025419851859>

World Bank Group (2021, January 8). *GDP per capita (current US$).* <https://data.worldbank.org/indicator/ny.gdp.pcap.cd?end=2019&most_recent_value_desc=true&start=1960>

Wu, A. D., Li, Z., & Zumbo, B. D. (2007). Decoding the meaning of factorial invariance and updating the practice of multi-group confirmatory factor analysis: A demonstration with TIMSS data. *Practical Assessment, Research, and Evaluation, 12*(1), 3-26. <https://doi.org/10.7275/mhqa-cd89>

Zumbo, B. D. (2005). Structural equation modeling and test validation. In B. Everitt and D. C. Howell, *Encyclopedia of Statistics in Behavioral Science* (pp. 1951-1958). John Wiley & Sons Ltd.

Zumbo, B. D. (2007). Validity: Foundational issues and statistical methodology. In C. R. Rao, & S. Sinharay (Eds.), *Handbook of Statistics, Vol. 26: Psychometrics* (pp. 45–79). Elsevier Science.
